# Supplementary material for: Streptococcus oriscaviae sp. nov. Infection Associated with Guinea Pigs
Source: PubMed Central journal article supplement (PMC9241640; doi:10.1128/spectrum.00014-22), 2022-05-05
Supplement: spectrum.00014-22-s001.pdf [file spectrum.00014-22-s001.pdf]

Table S1. The pairwise comparison of ANI values between *S. oriscaviae* HKU75<sup>T</sup> and 104 *Streptococcus* genomes.

| Species                                                                             | ANI (%) |
|-------------------------------------------------------------------------------------|---------|
| <i>Streptococcus porcorum</i> DSM28302 <sup>T</sup>                                 | 84.7    |
| <i>Streptococcus ferus</i> DSM 20646 <sup>T</sup>                                   | 84.2    |
| <i>Streptococcus porci</i> DSM 23759 <sup>T</sup>                                   | 83.9    |
| <i>Streptococcus orisratti</i> DSM 15617 <sup>T</sup>                               | 83.9    |
| <i>Streptococcus pseudoporcinus</i> NCTC13786 <sup>T</sup>                          | 83.6    |
| <i>Streptococcus dysgalactiae</i> subsp. <i>equisimilis</i> NCTC13762 <sup>T</sup>  | 83.5    |
| <i>Streptococcus agalactiae</i> NCTC8181 <sup>T</sup>                               | 83.3    |
| <i>Streptococcus plurextorum</i> DSM 22810 <sup>T</sup>                             | 83.3    |
| <i>Streptococcus parauberis</i> NCFD 2020 <sup>T</sup>                              | 82.9    |
| <i>Streptococcus urinalis</i> NCTC13766 <sup>T</sup>                                | 82.8    |
| <i>Streptococcus canis</i> NCTC12191 <sup>T</sup>                                   | 82.7    |
| <i>Streptococcus uberis</i> NCTC3858 <sup>T</sup>                                   | 82.6    |
| <i>Streptococcus gallolyticus</i> subsp. <i>pasteurianus</i> WUSP067 <sup>T</sup>   | 82.4    |
| <i>Streptococcus equi</i> subsp. <i>equi</i> NCTC9682 <sup>T</sup>                  | 82.1    |
| <i>Streptococcus pyogenes</i> DSM 20565 <sup>T</sup>                                | 82.0    |
| <i>Streptococcus suis</i> S735 <sup>T</sup>                                         | 81.9    |
| <i>Streptococcus iniae</i> QMA0248 <sup>T</sup>                                     | 81.9    |
| <i>Streptococcus dysgalactiae</i> FDAARGOS 1157 <sup>T</sup>                        | 81.8    |
| <i>Streptococcus salivarius</i> NCTC8618 <sup>T</sup>                               | 81.7    |
| <i>Streptococcus lutetiensis</i> NCTC13774 <sup>T</sup>                             | 81.5    |
| <i>Streptococcus gallolyticus</i> subsp. <i>gallolyticus</i> DSM 16831 <sup>T</sup> | 81.5    |
| <i>Streptococcus didelphis</i> DSM 15616 <sup>T</sup>                               | 81.4    |
| <i>Streptococcus mitis</i> NCTC 12261 <sup>T</sup>                                  | 81.4    |
| <i>Streptococcus koreensis</i> JS71 <sup>T</sup>                                    | 81.3    |
| <i>Streptococcus salivarius</i> subsp. <i>thermophilus</i> ATCC 19258 <sup>T</sup>  | 81.1    |
| <i>Streptococcus constellatus</i> subsp. <i>pharyngis</i> SK1060 <sup>T</sup>       | 81.1    |
| <i>Streptococcus hyointestinalis</i> NCTC12224 <sup>T</sup>                         | 81.0    |
| <i>Streptococcus hyovaginalis</i> DSM 12219 <sup>T</sup>                            | 81.0    |
| <i>Streptococcus bovimastitidis</i> NZ1587 <sup>T</sup>                             | 80.9    |
| <i>Streptococcus infantarius</i> FDAARGOS 1019 <sup>T</sup>                         | 80.9    |
| <i>Streptococcus intermedius</i> NCTC11324 <sup>T</sup>                             | 80.9    |
| <i>Streptococcus porcinus</i> NCTC10999 <sup>T</sup>                                | 80.9    |
| <i>Streptococcus criceti</i> HS-6 <sup>T</sup>                                      | 80.8    |
| <i>Streptococcus halotolerans</i> HTS9 <sup>T</sup>                                 | 80.8    |
| <i>Streptococcus phocae</i> ATCC 51973 <sup>T</sup>                                 | 80.7    |
| <i>Streptococcus parasuis</i> DSM 29126 <sup>T</sup>                                | 80.7    |
| <i>Streptococcus himalayensis</i> HTS2 <sup>T</sup>                                 | 80.6    |
| <i>Streptococcus equinus</i> ATCC 9812 <sup>T</sup>                                 | 80.6    |
| <i>Streptococcus sobrinus</i> NCTC12279 <sup>T</sup>                                | 80.6    |
| <i>Streptococcus phocae</i> subsp. <i>salmonis</i> C-4 <sup>T</sup>                 | 80.6    |
| <i>Streptococcus parasanguinis</i> NCTC12854 <sup>T</sup>                           | 80.6    |

|                                                                                     |      |
|-------------------------------------------------------------------------------------|------|
| <i>Streptococcus castoreus</i> DSM 17536 <sup>T</sup>                               | 80.5 |
| <i>Streptococcus minor</i> DSM 17118 <sup>T</sup>                                   | 80.5 |
| <i>Streptococcus australis</i> NCTC13166 <sup>T</sup>                               | 80.5 |
| <i>Streptococcus pneumoniae</i> DSM 20566 <sup>T</sup>                              | 80.4 |
| <i>Streptococcus oralis</i> FDAARGOS 1020 <sup>T</sup>                              | 80.4 |
| <i>Streptococcus cristatus</i> NCTC12479 <sup>T</sup>                               | 80.3 |
| <i>Streptococcus troglodytae</i> TKU31 <sup>T</sup>                                 | 80.3 |
| <i>Streptococcus equi</i> subsp. <i>ruminatorum</i> CECT 5772 <sup>T</sup>          | 80.2 |
| <i>Streptococcus henryi</i> DSM 19005 <sup>T</sup>                                  | 80.2 |
| <i>Streptococcus ruminantium</i> GUT187 <sup>T</sup>                                | 80.2 |
| <i>Streptococcus massiliensis</i> NCTC13765 <sup>T</sup>                            | 80.2 |
| <i>Streptococcus sanguinis</i> NCTC7863 <sup>T</sup>                                | 80.1 |
| <i>Streptococcus hongkongensis</i> CAIM 1895 <sup>T</sup>                           | 80.1 |
| <i>Streptococcus mutans</i> FDAARGOS 1458 <sup>T</sup>                              | 80.1 |
| <i>Streptococcus thoralensis</i> DSM 12221 <sup>T</sup>                             | 80.0 |
| <i>Streptococcus hillyeri</i> 28462 <sup>T</sup>                                    | 80.0 |
| <i>Streptococcus salivioxodontae</i> DSM 27513 <sup>T</sup>                         | 80.0 |
| <i>Streptococcus constellatus</i> NCTC11325 <sup>T</sup>                            | 79.9 |
| <i>Streptococcus halichoeri</i> CCUG48324 <sup>T</sup>                              | 79.8 |
| <i>Streptococcus gordonii</i> ATCC 10558 <sup>T</sup>                               | 79.8 |
| <i>Streptococcus pacificus</i> CSL7591 <sup>T</sup>                                 | 79.8 |
| <i>Streptococcus gwangjuense</i> ChDC B345 <sup>T</sup>                             | 79.8 |
| <i>Streptococcus lactarius</i> CCUG 66490 <sup>T</sup>                              | 79.8 |
| <i>Streptococcus pantholopis</i> TA 26 <sup>T</sup>                                 | 79.7 |
| <i>Streptococcus zalophi</i> CSL7508 <sup>T</sup>                                   | 79.7 |
| <i>Streptococcus peroris</i> ATCC 700780 <sup>T</sup>                               | 79.7 |
| <i>Streptococcus macacae</i> NCTC11558 <sup>T</sup>                                 | 79.7 |
| <i>Streptococcus vicugnae</i> SL1232 <sup>T</sup>                                   | 79.7 |
| <i>Streptococcus vestibularis</i> ATCC 49124 <sup>T</sup>                           | 79.6 |
| <i>Streptococcus rubneri</i> DSM 26920 <sup>T</sup>                                 | 79.6 |
| <i>Streptococcus penaeicida</i> CAIM 1838 <sup>T</sup>                              | 79.6 |
| <i>Streptococcus pseudopneumoniae</i> ATCC BAA-960 <sup>T</sup>                     | 79.6 |
| <i>Streptococcus respiraculi</i> HTS25 <sup>T</sup>                                 | 79.6 |
| <i>Streptococcus chenjunshii</i> Z15 <sup>T</sup>                                   | 79.6 |
| <i>Streptococcus infantarius</i> subsp. <i>coli</i> DSM22957 <sup>T</sup>           | 79.5 |
| <i>Streptococcus rupicaprae</i> DSM28303 <sup>T</sup>                               | 79.5 |
| <i>Streptococcus pharyngis</i> CCUG 66496 <sup>T</sup>                              | 79.5 |
| <i>Streptococcus anginosus</i> NCTC10713 <sup>T</sup>                               | 79.5 |
| <i>Streptococcus downei</i> NCTC11391 <sup>T</sup>                                  | 79.5 |
| <i>Streptococcus gallolyticus</i> subsp. <i>macedonicus</i> CCUG 39970 <sup>T</sup> | 79.4 |
| <i>Streptococcus marmotae</i> HTS5 <sup>T</sup>                                     | 79.4 |
| <i>Streptococcus loxodontisalivarius</i> DSM 27382 <sup>T</sup>                     | 79.4 |
| <i>Streptococcus merionis</i> NCTC13788 <sup>T</sup>                                | 79.4 |
| <i>Streptococcus marimammalium</i> DSM 18627 <sup>T</sup>                           | 79.3 |

|                                                                              |      |
|------------------------------------------------------------------------------|------|
| <i>Streptococcus infantis</i> ATCC 700779 <sup>T</sup>                       | 79.2 |
| <i>Streptococcus ursoris</i> DSM 22768 <sup>T</sup>                          | 79.2 |
| <i>Streptococcus periodonticum</i> KCOM 2412 <sup>T</sup>                    | 79.2 |
| <i>Streptococcus moroccensis</i> DSM105143 <sup>T</sup>                      | 79.1 |
| <i>Streptococcus caballi</i> DSM 19004 <sup>T</sup>                          | 79.1 |
| <i>Streptococcus entericus</i> DSM 14446 <sup>T</sup>                        | 79.0 |
| <i>Streptococcus acidominimus</i> NCTC12957 <sup>T</sup>                     | 79.0 |
| <i>Streptococcus gallinaceus</i> DSM15349 <sup>T</sup>                       | 79.0 |
| <i>Streptococcus ovuberis</i> CCUG 69612 <sup>T</sup>                        | 78.9 |
| <i>Streptococcus oralis</i> subsp. <i>dentisani</i> 7747 <sup>T</sup>        | 78.8 |
| <i>Streptococcus ovis</i> DSM 16829 <sup>T</sup>                             | 78.8 |
| <i>Streptococcus sinensis</i> HKU4 <sup>T</sup>                              | 78.7 |
| <i>Streptococcus ratti</i> FA-1 <sup>T</sup>                                 | 78.6 |
| <i>Streptococcus cuniculi</i> CCUG 65085 <sup>T</sup>                        | 78.4 |
| <i>Streptococcus chosunense</i> ChDC B353 <sup>T</sup>                       | 78.4 |
| <i>Streptococcus azizii</i> 12-5202 <sup>T</sup>                             | 78.3 |
| <i>Streptococcus devriesei</i> DSM 19639 <sup>T</sup>                        | 78.1 |
| <i>Streptococcus anginosus</i> subsp. <i>whileyi</i> CCUG 39159 <sup>T</sup> | 78.0 |
| <i>Streptococcus oricebi</i> CCUG 70868 <sup>T</sup>                         | 77.9 |

---

Table S2. Single gene locus and genome sequences used for analyses in the present study.

| Species                                                                       | GenBank accession numbers |                         |                         |                         |
|-------------------------------------------------------------------------------|---------------------------|-------------------------|-------------------------|-------------------------|
|                                                                               | 16S rRNA                  | <i>groEL</i>            | <i>rpoB</i>             | Genome                  |
| <i>Streptococcus mitis</i> NCTC 12261 <sup>T</sup>                            | AF003929.1                | <sup>a</sup> 246201     | <sup>a</sup> 246201     | <sup>a</sup> 246201.6   |
| <i>Streptococcus oricebi</i> CCUG 70868 <sup>T</sup>                          | LC002970.1                | <sup>a</sup> 1547447    | <sup>a</sup> 1547447    | <sup>a</sup> 1547447.3  |
| <i>Streptococcus moroccensis</i> DSM105143 <sup>T</sup>                       | KF999654.1                | <sup>b</sup> 2926467293 | <sup>b</sup> 2926467293 | <sup>b</sup> 2926467293 |
| <i>Streptococcus porcorum</i> DSM28302 <sup>T</sup>                           | FN643224.1                | <sup>b</sup> 2928214140 | <sup>b</sup> 2928214140 | <sup>b</sup> 2928214140 |
| <i>Streptococcus rupicaprae</i> DSM28303 <sup>T</sup>                         | FN813250.1                | <sup>b</sup> 2928216081 | <sup>b</sup> 2928216081 | <sup>b</sup> 2928216081 |
| <i>Streptococcus infantarius</i> subsp. <i>coli</i> DSM22957 <sup>T</sup>     | AF429763.1                | <sup>b</sup> 2928254298 | <sup>b</sup> 2928254298 | <sup>b</sup> 2928254298 |
| <i>Streptococcus parasuis</i> DSM 29126 <sup>T</sup>                          | LC208542.1                | <sup>b</sup> 2928335100 | <sup>b</sup> 2928335100 | <sup>b</sup> 2928335100 |
| <i>Streptococcus gallinaceus</i> DSM15349 <sup>T</sup>                        | AJ307888.1                | <sup>b</sup> 2928547191 | <sup>b</sup> 2928547191 | <sup>b</sup> 2928547191 |
| <i>Streptococcus parauberis</i> NCFD 2020 <sup>T</sup>                        | AY584477.1                | AEUT02000001.1          | AEUT02000001.1          | GCA_000187935.2         |
| <i>Streptococcus criceti</i> HS-6 <sup>T</sup>                                | AJ420198.1                | AEUV02000002.1          | AEUV02000002.1          | GCA_000187975.3         |
| <i>Streptococcus anginosus</i> subsp. <i>whileyi</i> CCUG 39159 <sup>T</sup>  | JN787193.1                | AICP01000035.1          | AICP01000007.1          | GCA_000257765.1         |
| <i>Streptococcus ratti</i> FA-1 <sup>T</sup>                                  | AJ420201.1                | AJTZ01000003.1          | AJTZ01000003.1          | GCA_000286075.1         |
| <i>Streptococcus troglodytae</i> TKU31 <sup>T</sup>                           | AB679299.1                | AP014612.1              | AP014612.1              | GCA_002355215.1         |
| <i>Streptococcus ruminantium</i> GUT187 <sup>T</sup>                          | LC195038.1                | AP018400.1              | AP018400.1              | GCA_003609975.1         |
| <i>Streptococcus henryi</i> DSM 19005 <sup>T</sup>                            | EF364097.1                | AQYA01000031.1          | AQYA01000031.1          | GCA_000376985.1         |
| <i>Streptococcus minor</i> DSM 17118 <sup>T</sup>                             | AY232832.1                | AQYB01000026.1          | AQYB01000022.1          | GCA_000377005.1         |
| <i>Streptococcus hyovaginalis</i> DSM 12219 <sup>T</sup>                      | Y07601.1                  | ATVP01000011.1          | ATVP01000011.1          | GCA_000420785.1         |
| <i>Streptococcus devriesei</i> DSM 19639 <sup>T</sup>                         | AJ564067.1                | AUIN01000013.1          | AUIN01000013.1          | GCA_000423725.1         |
| <i>Streptococcus plurextorum</i> DSM 22810 <sup>T</sup>                       | AM774228.1                | AUIO01000005.1          | AUIO01000006.1          | GCA_000423745.1         |
| <i>Streptococcus porci</i> DSM 23759 <sup>T</sup>                             | AM941160.1                | AUIP01000017.1          | AUIP01000011.1          | GCA_000423765.1         |
| <i>Streptococcus castoreus</i> DSM 17536 <sup>T</sup>                         | AJ606047.1                | AUKZ01000013.1          | AUKZ01000003.1          | GCA_000425025.1         |
| <i>Streptococcus equi</i> subsp. <i>ruminantium</i> CECT 5772 <sup>T</sup>    | AJ605748.1                | AWEX01000060.1          | AWEX01000061.1          | GCA_000706805.1         |
| <i>Streptococcus constellatus</i> subsp. <i>pharyngis</i> SK1060 <sup>T</sup> | AY309095.1                | BASX01000017.1          | BASX01000011.1          | GCA_900459125.1         |

|                                                                                     |                   |                   |                   |                 |
|-------------------------------------------------------------------------------------|-------------------|-------------------|-------------------|-----------------|
| <i>Streptococcus oralis</i> subsp. <i>dentisani</i> 7747 <sup>T</sup>               | HG315101.1        | CAUK01000003.1    | CAUK01000004.1    | GCA_000382825.1 |
| <i>Streptococcus suis</i> S735 <sup>T</sup>                                         | AB002525.1        | CP003736.1        | CP003736.1        | GCA_000294495.1 |
| <i>Streptococcus pantholopis</i> TA 26 <sup>T</sup>                                 | KU877326.1        | CP014699.1        | CP014699.1        | GCA_001642085.1 |
| <i>Streptococcus halotolerans</i> HTS9 <sup>T</sup>                                 | KU865003.1        | CP014835.1        | CP014835.1        | GCA_001598035.1 |
| <i>Streptococcus marmotae</i> HTS5 <sup>T</sup>                                     | KU992301.1        | CP015196.1        | CP015196.1        | GCA_001623565.1 |
| <i>Streptococcus himalayensis</i> HTS2 <sup>T</sup>                                 | KX679400.1        | CP016953.1        | CP016953.1        | GCA_001708305.1 |
| <i>Streptococcus gallolyticus</i> subsp. <i>gallolyticus</i> DSM 16831 <sup>T</sup> | AF104114.1        | CP018822.1        | CP018822.1        | GCA_002000985.1 |
| <i>Streptococcus iniae</i> QMA0248 <sup>T</sup>                                     | AF335572.1        | CP022392.1        | CP022392.1        | GCA_002220115.1 |
| <i>Streptococcus respiraculi</i> HTS25 <sup>T</sup>                                 | MF509297.1        | CP022680.1        | CP022680.1        | GCA_003595525.1 |
| <i>Streptococcus chenjunshii</i> Z15 <sup>T</sup>                                   | MG847187.1        | CP031733.1        | CP031733.1        | GCA_003086355.2 |
| <i>Streptococcus koreensis</i> JS71 <sup>T</sup>                                    | MK748164.1        | CP032620.1        | CP032620.1        | GCA_003627135.1 |
| <i>Streptococcus gwangjuense</i> ChDC B345 <sup>T</sup>                             | KF733672.1        | CP032621.1        | CP032621.1        | GCA_003627155.1 |
| <i>Streptococcus periodonticum</i> KCOM 2412 <sup>T</sup>                           | MK452275.1        | CP034543.1        | CP034543.1        | GCA_003963555.1 |
| <i>Streptococcus salivarius</i> subsp. <i>thermophilus</i> ATCC 19258 <sup>T</sup>  | AY188354.1        | CP038020.1        | CP038020.1        | GCA_010120595.1 |
| <i>Streptococcus gallolyticus</i> subsp. <i>pasteurianus</i> WUSP067 <sup>T</sup>   | AJ297216.1        | CP039457.1        | CP039457.1        | GCA_004843545.1 |
| <i>Streptococcus infantarius</i> FDAARGOS 1019 <sup>T</sup>                         | AF429762.1        | CP065994.1        | CP065994.1        | GCA_016127275.1 |
| <i>Streptococcus oralis</i> FDAARGOS 1020 <sup>T</sup>                              | AF003932.1        | CP066021.1        | CP066021.1        | GCA_016127555.1 |
| <i>Streptococcus dysgalactiae</i> FDAARGOS 1157 <sup>T</sup>                        | AB002485.1        | CP068057.1        | CP068057.1        | GCA_016724885.1 |
| <i>Streptococcus oriscaviae</i> HKU75 <sup>T</sup>                                  | ON000582.1        | MW182243.1        | MW182242.1        | GCA_018137985.1 |
| <i>Streptococcus mutans</i> FDAARGOS 1458 <sup>T</sup>                              | AB680533.1        | CP077404.1        | CP077404.1        | GCA_019048645.1 |
| <i>Lactococcus lactis</i> ATCC 19435 <sup>T</sup>                                   | NR_040955.1       | FMTF01000003.1    | FMTF01000007.1    | GCA_900099625.1 |
| <i>Streptococcus equinus</i> ATCC 9812 <sup>T</sup>                                 | AB680295.1        | GL698434.1        | GL698434.1        | GCA_000187265.1 |
| <i>Streptococcus infantis</i> ATCC 700779 <sup>T</sup>                              | AB008315.1        | GL732439.1        | GL732439.1        | GCA_000187465.1 |
| <i>Streptococcus peroris</i> ATCC 700780 <sup>T</sup>                               | AB008314.1        | GL732463.1        | GL732463.1        | GCA_000187585.1 |
| <i>Streptococcus vestibularis</i> ATCC 49124 <sup>T</sup>                           | AY188353.1        | GL831112.1        | GL831112.1        | GCA_000188295.1 |
| <i>Streptococcus ovuberis</i> CCUG 69612 <sup>T</sup>                               | LT714696.1        | JAAXPR010000018.1 | JAAXPR010000021.1 | GCA_012396585.1 |
| <i>Streptococcus ursoris</i> DSM 22768 <sup>T</sup>                                 | AB501126.1        | JABASA010000015.1 | JABASA010000015.1 | GCA_012843165.1 |
| <i>Streptococcus vicugnae</i> SL1232 <sup>T</sup>                                   | JAEMHW010000010.1 | JAEMHW010000003.1 | JAEMHW010000003.1 | GCA_016461705.1 |

|                                                                     |                   |                   |                   |                 |
|---------------------------------------------------------------------|-------------------|-------------------|-------------------|-----------------|
| <i>Streptococcus pacificus</i> CSL7591 <sup>T</sup>                 | JAENBO010000009.1 | JAENBO010000006.1 | JAENBO010000006.1 | GCA_016481305.1 |
| <i>Streptococcus zalophi</i> CSL7508 <sup>T</sup>                   | MT537727.1        | JAENBP010000007.1 | JAENBP010000007.1 | GCA_016481285.1 |
| <i>Streptococcus loxodontisalivarius</i> DSM 27382 <sup>T</sup>     | AB828326.1        | JAFBEH010000012.1 | JAFBEH010000040.1 | GCA_016908645.1 |
| <i>Streptococcus saliviloxodontae</i> DSM 27513 <sup>T</sup>        | AB828327.1        | JAFBEI010000027.1 | JAFBEI010000033.1 | GCA_016908655.1 |
| <i>Streptococcus sinensis</i> HKU4 <sup>T</sup>                     | AF432856.1        | JPEN01000050.1    | JPEN01000109.1    | GCA_000767835.1 |
| <i>Streptococcus hongkongensis</i> CAIM 1895 <sup>T</sup>           | HQ335006.1        | JX046531.1        | JX046537.1        | GCA_000785845.1 |
| <i>Streptococcus phocae</i> subsp. <i>salmonis</i> C-4 <sup>T</sup> | FR846243.1        | JSAP01000003.1    | JSAP01000060.1    | GCA_000772915.1 |
| <i>Streptococcus caballi</i> DSM 19004 <sup>T</sup>                 | EF364098.1        | KB904073.1        | KB904071.1        | GCA_000379985.1 |
| <i>Streptococcus entericus</i> DSM 14446 <sup>T</sup>               | AJ409287.1        | KB904183.1        | KB904155.1        | GCA_000380025.1 |
| <i>Streptococcus didelphis</i> DSM 15616 <sup>T</sup>               | AF176103.1        | KB904189.1        | KB904198.1        | GCA_000380005.1 |
| <i>Streptococcus marimammalium</i> DSM 18627 <sup>T</sup>           | AJ634751.1        | KB904360.1        | KB904360.1        | GCA_000380045.1 |
| <i>Streptococcus orisratti</i> DSM 15617 <sup>T</sup>               | AF124350.1        | KB904501.1        | KB904515.1        | GCA_000380105.1 |
| <i>Streptococcus ovis</i> DSM 16829 <sup>T</sup>                    | Y17358.1          | KB904584.1        | KB904584.1        | GCA_000380125.1 |
| <i>Streptococcus thoralensis</i> DSM 12221 <sup>T</sup>             | Y09007.1          | KB904609.1        | KB904604.1        | GCA_000380145.1 |
| <i>Streptococcus gordonii</i> ATCC 10558 <sup>T</sup>               | EU156758.1        | KQ759749.1        | KQ759749.1        | GCA_001469295.1 |
| <i>Streptococcus phocae</i> ATCC 51973 <sup>T</sup>                 | AF235052.1        | LHQM01000006.1    | LHQM01000035.1    | GCA_001302265.1 |
| <i>Streptococcus pyogenes</i> DSM 20565 <sup>T</sup>                | AB002521.1        | LN831034.1        | LN831034.1        | GCA_002055535.1 |
| <i>Streptococcus pneumoniae</i> DSM 20566 <sup>T</sup>              | AB681893.1        | LN831051.1        | LN831051.1        | GCA_001457635.1 |
| <i>Streptococcus penaeicida</i> CAIM 1838 <sup>T</sup>              | KU212904.1        | LOCM01000033.1    | LOCM01000030.1    | GCA_002887775.1 |
| <i>Streptococcus salivarius</i> NCTC8618 <sup>T</sup>               | AY188352.1        | LR134274.1        | LR134274.1        | GCA_900636435.1 |
| <i>Streptococcus anginosus</i> NCTC10713 <sup>T</sup>               | AF104678.1        | LR134283.1        | LR134283.1        | GCA_900636475.1 |
| <i>Streptococcus canis</i> NCTC12191 <sup>T</sup>                   | AB002483.1        | LR134293.1        | LR134293.1        | GCA_900636575.1 |
| <i>Streptococcus urinalis</i> NCTC13766 <sup>T</sup>                | DQ303194.1        | LR134323.1        | LR134323.1        | GCA_900636885.1 |
| <i>Streptococcus pseudoporcinus</i> NCTC13786 <sup>T</sup>          | DQ303209.1        | LR134341.1        | LR134341.1        | GCA_900637075.1 |
| <i>Streptococcus equi</i> subsp. <i>equi</i> NCTC9682 <sup>T</sup>  | AB002515.1        | LR134389.1        | LR134389.1        | GCA_900637675.1 |
| <i>Streptococcus ferus</i> DSM 20646 <sup>T</sup>                   | AY584479.1        | LS483343.1        | LS483343.1        | GCA_900475025.1 |
| <i>Streptococcus sobrinus</i> NCTC12279 <sup>T</sup>                | AJ243966.1        | LS483378.1        | LS483378.1        | GCA_900475395.1 |

|                                                                                    |                |                |                |                 |
|------------------------------------------------------------------------------------|----------------|----------------|----------------|-----------------|
| <i>Streptococcus cristatus</i> NCTC12479 <sup>T</sup>                              | AY188347.1     | LS483383.1     | LS483383.1     | GCA_900475445.1 |
| <i>Streptococcus sanguinis</i> NCTC7863 <sup>T</sup>                               | AB002524.1     | LS483385.1     | LS483385.1     | GCA_900475505.1 |
| <i>Streptococcus porcinus</i> NCTC10999 <sup>T</sup>                               | AB002523.1     | LS483388.1     | LS483388.1     | GCA_900475415.1 |
| <i>Streptococcus uberis</i> NCTC3858 <sup>T</sup>                                  | AB002526.1     | LS483397.1     | LS483397.1     | GCA_900475595.1 |
| <i>Streptococcus lutetiensis</i> NCTC13774 <sup>T</sup>                            | AJ297215.1     | LS483403.1     | LS483403.1     | GCA_900475675.1 |
| <i>Streptococcus intermedius</i> NCTC11324 <sup>T</sup>                            | AF104671.1     | LS483436.1     | LS483436.1     | GCA_900475975.1 |
| <i>Streptococcus australis</i> NCTC13166 <sup>T</sup>                              | AF184974.1     | LS483444.1     | LS483444.1     | GCA_900476055.1 |
| <i>Streptococcus merionis</i> NCTC13788 <sup>T</sup>                               | AM396401.1     | LT906439.1     | LT906439.1     | GCA_900187085.1 |
| <i>Streptococcus bovimastitidis</i> NZ1587 <sup>T</sup>                            | LZDD01000001.1 | LZDD01000002.1 | LZDD01000003.1 | GCA_001885095.1 |
| <i>Streptococcus lactarius</i> CCUG 66490 <sup>T</sup>                             | GU045364.1     | MRXX01000008.1 | MRXX01000008.1 | GCA_016642265.1 |
| <i>Streptococcus cuniculi</i> CCUG 65085 <sup>T</sup>                              | MSJM01000016.1 | MSJM01000007.1 | MSJM01000007.1 | GCA_001921845.1 |
| <i>Streptococcus azizii</i> 12-5202 <sup>T</sup>                                   | KM609118.1     | MSPR01000015.1 | MSPR01000015.1 | GCA_001984715.1 |
| <i>Streptococcus pseudopneumoniae</i> ATCC BAA-960 <sup>T</sup>                    | AY612844.1     | MWSM01000042.1 | MWSM01000062.1 | GCA_002087075.1 |
| <i>Streptococcus equi</i> subsp. <i>zooepidemicus</i> CCUG 23256 <sup>T</sup>      | AB002516.1     | NA             | NA             | NA              |
| <i>Streptococcus alactolyticus</i> CCUG 27297 <sup>T</sup>                         | AF201899.1     | NA             | NA             | NA              |
| <i>Streptococcus ictaluri</i> DSM 21677 <sup>T</sup>                               | DQ462421.1     | NA             | NA             | NA              |
| <i>Streptococcus orisuis</i> DSM 18307 <sup>T</sup>                                | AB182324.1     | NA             | NA             | NA              |
| <i>Streptococcus dentirousetti</i> CCUG 55774 <sup>T</sup>                         | AB259061.1     | NA             | NA             | NA              |
| <i>Streptococcus dentapri</i> DSM 21999 <sup>T</sup>                               | AB469560.1     | NA             | NA             | NA              |
| <i>Streptococcus danieliae</i> DSM 22233 <sup>T</sup>                              | GQ456229.1     | NA             | NA             | NA              |
| <i>Streptococcus oralis</i> subsp. <i>tigurinus</i> AZ_3a <sup>T</sup>             | JN004270.1     | NA             | NA             | NA              |
| <i>Streptococcus orisasini</i> DSM 25193 <sup>T</sup>                              | AB668377.1     | NA             | NA             | NA              |
| <i>Streptococcus dentasini</i> DSM 25137 <sup>T</sup>                              | AB668378.1     | NA             | NA             | NA              |
| <i>Streptococcus constellatus</i> subsp. <i>viborgensis</i> DSM 25819 <sup>T</sup> | JN787160.1     | NA             | NA             | NA              |
| <i>Streptococcus pluranimalium</i> DSM 15636 <sup>T</sup>                          | JX986968.1     | NA             | NA             | NA              |
| <i>Streptococcus oriloxodontae</i> DSM 27377 <sup>T</sup>                          | AB827327.1     | NA             | NA             | NA              |
| <i>Streptococcus tangierensis</i> DSM 105173 <sup>T</sup>                          | KF999656.1     | NA             | NA             | NA              |
| <i>Streptococcus cameli</i> DSM 105751 <sup>T</sup>                                | KF999657.1     | NA             | NA             | NA              |

|                                                                                     |                |                |                |                 |
|-------------------------------------------------------------------------------------|----------------|----------------|----------------|-----------------|
| <i>Streptococcus rifensis</i> DSM 105174 <sup>T</sup>                               | KF999655.1     | NA             | NA             | NA              |
| <i>Streptococcus panodentis</i> DSM 29921 <sup>T</sup>                              | LC012889.1     | NA             | NA             | NA              |
| <i>Streptococcus dentiloxodontae</i> DSM 27381 <sup>T</sup>                         | AB828596.1     | NA             | NA             | NA              |
| <i>Streptococcus caviae</i> DSM 102819 <sup>T</sup>                                 | LT546457.1     | NA             | NA             | NA              |
| <i>Streptococcus gallolyticus</i> subsp. <i>macedonicus</i> CCUG 39970 <sup>T</sup> | LC097080.1     | PKIB01000009.1 | PKIB01000009.1 | GCA_002860805.1 |
| <i>Streptococcus chosunense</i> ChDC B353 <sup>T</sup>                              | KF733679.1     | RBCK01000002.1 | RBCK01000002.1 | GCA_003626515.1 |
| <i>Streptococcus hillyeri</i> 28462 <sup>T</sup>                                    | MH643904.1     | RCVM01000014.1 | RCVM01000005.1 | GCA_003686955.1 |
| <i>Streptococcus rubneri</i> DSM 26920 <sup>T</sup>                                 | JX861483.1     | SRRP01000002.1 | SRRP01000002.1 | GCA_004785935.1 |
| <i>Streptococcus agalactiae</i> NCTC8181 <sup>T</sup>                               | AB002479.1     | UAVB01000001.1 | UAVB01000001.1 | GCA_900458965.1 |
| <i>Streptococcus acidominimus</i> NCTC12957 <sup>T</sup>                            | JX986969.1     | UHEN01000001.1 | UHEN01000001.1 | GCA_900459045.1 |
| <i>Streptococcus downei</i> NCTC11391 <sup>T</sup>                                  | AJ420200.1     | UHFA01000002.1 | UHFA01000002.1 | GCA_900459175.1 |
| <i>Streptococcus constellatus</i> NCTC11325 <sup>T</sup>                            | AB355605.1     | UHFC01000002.1 | UHFC01000002.1 | GCA_000474135.1 |
| <i>Streptococcus dysgalactiae</i> subsp. <i>equisimilis</i> NCTC13762 <sup>T</sup>  | DQ232540.1     | UHFD01000002.1 | UHFD01000002.1 | GCA_900459095.1 |
| <i>Streptococcus hyointestinalis</i> NCTC12224 <sup>T</sup>                         | AB002518.1     | UHFN01000007.1 | UHFN01000007.1 | GCA_900459405.1 |
| <i>Streptococcus massiliensis</i> NCTC13765 <sup>T</sup>                            | AY769997.1     | UHFR01000005.1 | UHFR01000005.1 | GCA_900459365.1 |
| <i>Streptococcus macacae</i> NCTC11558 <sup>T</sup>                                 | AJ420199.1     | UHFV01000002.1 | UHFV01000002.1 | GCA_900459485.1 |
| <i>Streptococcus parasanguinis</i> NCTC12854 <sup>T</sup>                           | NR_024842.1    | UHFZ01000003.1 | UHFZ01000003.1 | GCA_900459355.1 |
| <i>Streptococcus pharyngis</i> CCUG 66496 <sup>T</sup>                              | VOHL01000012.1 | VOHL01000008.1 | VOHL01000004.1 | GCA_007859195.1 |
| <i>Streptococcus halichoeri</i> CCUG48324 <sup>T</sup>                              | AJ606046.1     | WLZU01000001.1 | WLZU01000002.1 | GCA_009870755.1 |

<sup>a</sup>Genomes downloaded from PATRIC server (1).

<sup>b</sup>Genomes downloaded from JGI (2).

NA, sequences not available in public databases.



Table S3. Core genes used in the UBCG analysis.

| Gene        | COG ID  | Function                                               |
|-------------|---------|--------------------------------------------------------|
| <i>alaS</i> | COG0013 | Alanine-tRNA ligase                                    |
| <i>argS</i> | COG0018 | Arginine-tRNA ligase                                   |
| <i>aspS</i> | COG0173 | Aspartate-tRNA ligase                                  |
| <i>cgtA</i> | COG0536 | GTPase ObgE/CgtA                                       |
| <i>coaE</i> | COG0237 | Dephospho-CoA kinase                                   |
| <i>cysS</i> | COG0215 | Cysteine-tRNA ligase                                   |
| <i>dnaA</i> | COG0593 | Chromosomal replication initiator protein DnaA         |
| <i>dnaG</i> | COG0358 | DNA primase                                            |
| <i>dnaX</i> | COG2812 | DNA polymerase III subunit gamma                       |
| <i>engA</i> | COG1160 | GTPase Der                                             |
| <i>ffh</i>  | COG0541 | Signal recognition particle protein                    |
| <i>fmt</i>  | COG0223 | Methionyl-tRNA formyltransferase                       |
| <i>frf</i>  | COG0233 | Ribosome-recycling factor                              |
| <i>ftsY</i> | COG0552 | Signal recognition particle receptor FtsY              |
| <i>gmK</i>  | COG0194 | Guanylate kinase                                       |
| <i>hisS</i> | COG0124 | Histidine-tRNA ligase                                  |
| <i>ileS</i> | COG0060 | Isoleucine-tRNA ligase 1                               |
| <i>infB</i> | COG0532 | Translation initiation factor IF-2                     |
| <i>infC</i> | COG0290 | Translation initiation factor IF-3                     |
| <i>ksgA</i> | COG0030 | Ribosomal RNA small subunit methyltransferase A        |
| <i>lepA</i> | COG0481 | Elongation factor 4                                    |
| <i>leuS</i> | COG0495 | Leucine-tRNA ligase                                    |
| <i>ligA</i> | COG0272 | DNA ligase                                             |
| <i>nusA</i> | COG0195 | Transcription termination/antitermination protein NusA |
| <i>nusG</i> | COG0250 | Transcription termination/antitermination protein NusG |
| <i>pgk</i>  | COG0126 | Phosphoglycerate kinase                                |
| <i>pheS</i> | COG0016 | Phenylalanine-tRNA ligase alpha subunit                |
| <i>pheT</i> | COG0073 | Phenylalanine-tRNA ligase beta subunit                 |
| <i>prfA</i> | COG0216 | Peptide chain release factor 1                         |
| <i>pyrG</i> | COG0504 | CTP synthase                                           |
| <i>recA</i> | COG0468 | DNA recombination and repair protein                   |
| <i>rbfA</i> | COG0858 | 30S ribosome-binding factor                            |
| <i>rnc</i>  | COG0571 | Ribonuclease 3                                         |
| <i>rplA</i> | COG0081 | 50S ribosomal protein L1                               |
| <i>rplB</i> | COG0090 | 50S ribosomal protein L2                               |
| <i>rplC</i> | COG0087 | 50S ribosomal protein L3                               |
| <i>rplD</i> | COG0088 | 50S ribosomal protein L4                               |
| <i>rplE</i> | COG0094 | 50S ribosomal protein L5                               |
| <i>rplF</i> | COG0097 | 50S ribosomal protein L6                               |
| <i>rplH</i> | COG0359 | 50S ribosomal protein L9                               |
| <i>rplJ</i> | COG0244 | 50S ribosomal protein L10                              |
| <i>rplK</i> | COG0080 | 50S ribosomal protein L11                              |

|             |         |                                           |
|-------------|---------|-------------------------------------------|
| <i>rplL</i> | COG0222 | 50S ribosomal protein L7/L12              |
| <i>rplM</i> | COG0102 | 50S ribosomal protein L13                 |
| <i>rplN</i> | COG0093 | 50S ribosomal protein L14                 |
| <i>rplO</i> | COG0200 | 50S ribosomal protein L15                 |
| <i>rplP</i> | COG0197 | 50S ribosomal protein L16                 |
| <i>rplQ</i> | COG0203 | 50S ribosomal protein L17                 |
| <i>rplR</i> | COG0256 | 50S ribosomal protein L18                 |
| <i>rplS</i> | COG0335 | 50S ribosomal protein L19                 |
| <i>rplT</i> | COG0292 | 50S ribosomal protein L20                 |
| <i>rplU</i> | COG0261 | 50S ribosomal protein L21                 |
| <i>rplV</i> | COG0091 | 50S ribosomal protein L22                 |
| <i>rplW</i> | COG0089 | 50S ribosomal protein L23                 |
| <i>rplX</i> | COG0198 | 50S ribosomal protein L24                 |
| <i>rpmA</i> | COG0211 | 50S ribosomal protein L27                 |
| <i>rpmC</i> | COG0255 | 50S ribosomal protein L29                 |
| <i>rpmI</i> | COG0291 | 50S ribosomal protein L35                 |
| <i>rpoA</i> | COG0202 | DNA-directed RNA polymerase subunit alpha |
| <i>rpoB</i> | COG0085 | DNA-directed RNA polymerase subunit beta  |
| <i>rpoC</i> | COG0086 | DNA-directed RNA polymerase subunit beta' |
| <i>rpsB</i> | COG0052 | 30S ribosomal protein S2                  |
| <i>rpsC</i> | COG0092 | 30S ribosomal protein S3                  |
| <i>rpsD</i> | COG0522 | 30S ribosomal protein S4                  |
| <i>rpsE</i> | COG0098 | 30S ribosomal protein S5                  |
| <i>rpsF</i> | COG0360 | 30S ribosomal protein S6                  |
| <i>rpsG</i> | COG0049 | 30S ribosomal protein S7                  |
| <i>rpsH</i> | COG0096 | 30S ribosomal protein S8                  |
| <i>rpsI</i> | COG0103 | 30S ribosomal protein S9                  |
| <i>rpsJ</i> | COG0051 | 30S ribosomal protein S10                 |
| <i>rpsK</i> | COG0100 | 30S ribosomal protein S11                 |
| <i>rpsL</i> | COG0048 | 30S ribosomal protein S12                 |
| <i>rpsM</i> | COG0099 | 30S ribosomal protein S13                 |
| <i>rpsO</i> | COG0184 | 30S ribosomal protein S15                 |
| <i>rpsP</i> | COG0228 | 30S ribosomal protein S16                 |
| <i>rpsQ</i> | COG0186 | 30S ribosomal protein S17                 |
| <i>rpsR</i> | COG0238 | 30S ribosomal protein S18                 |
| <i>rpsS</i> | COG0185 | 30S ribosomal protein S19                 |
| <i>rpsT</i> | COG0268 | 30S ribosomal protein S20                 |
| <i>secA</i> | COG0653 | Protein translocase subunit SecA          |
| <i>secG</i> | COG1314 | Protein-export membrane protein SecG      |
| <i>secY</i> | COG0201 | Protein translocase subunit SecY          |
| <i>serS</i> | COG0172 | Serine-tRNA ligase                        |
| <i>smpB</i> | COG0691 | SsrA-binding protein                      |
| <i>tig</i>  | COG0544 | Trigger factor                            |
| <i>tilS</i> | COG0037 | tRNA(Ile)-lysine synthase                 |

|             |         |                                                |
|-------------|---------|------------------------------------------------|
| <i>truB</i> | COG0130 | tRNA pseudouridine synthase B                  |
| <i>tsaD</i> | COG0533 | tRNA N6-adenosine threonylcarbamoyltransferase |
| <i>tsf</i>  | COG0264 | Elongation factor Ts                           |
| <i>uvrB</i> | COG0556 | UvrABC system protein B                        |
| <i>ybeY</i> | COG0319 | Endoribonuclease YbeY                          |
| <i>ychF</i> | COG0012 | Ribosome-binding ATPase YchF                   |

---

Table S4. *Streptococcus* genome sequences used in multigene-based phylogenomic treeing approach.

| Species                                                                       | GenBank accession number | Group         |
|-------------------------------------------------------------------------------|--------------------------|---------------|
| <i>Streptococcus porcorum</i> DSM28302 <sup>T</sup>                           | <sup>a</sup> 2928214140  | NA            |
| <i>Streptococcus parasuis</i> DSM 29126 <sup>T</sup>                          | <sup>a</sup> 2928335100  | Suis          |
| <i>Streptococcus mitis</i> NCTC 12261 <sup>T</sup>                            | GCA_000148585.3          | Mitis         |
| <i>Streptococcus parasanguinis</i> NCTC12854 <sup>T</sup>                     | GCA_000164675.2          | Mitis         |
| <i>Streptococcus infantis</i> ATCC 700779 <sup>T</sup>                        | GCA_000187465.1          | Mitis         |
| <i>Streptococcus peroris</i> ATCC 700780 <sup>T</sup>                         | GCA_000187585.1          | Mitis         |
| <i>Streptococcus macacae</i> NCTC 11558 <sup>T</sup>                          | GCA_000187995.3          | Mutans        |
| <i>Streptococcus ictaluri</i> DSM 21677 <sup>T</sup>                          | GCA_000188015.3          | Pyogenic      |
| <i>Streptococcus vestibularis</i> ATCC 49124 <sup>T</sup>                     | GCA_000188295.1          | Salivarius    |
| <i>Streptococcus constellatus</i> subsp. <i>pharyngis</i> SK1060 <sup>T</sup> | GCA_000223295.2          | Gordonii      |
| <i>Streptococcus ratti</i> FA-1 <sup>T</sup>                                  | GCA_000286075.1          | Mutans        |
| <i>Streptococcus suis</i> S735 <sup>T</sup>                                   | GCA_000294495.1          | Suis          |
| <i>Streptococcus oralis</i> subsp. <i>tigurinus</i> AZ_3a <sup>T</sup>        | GCA_000344275.1          | Mitis         |
| <i>Streptococcus minor</i> DSM 17118 <sup>T</sup>                             | GCA_000377005.1          | Suis          |
| <i>Streptococcus ovis</i> DSM 16829 <sup>T</sup>                              | GCA_000380125.1          | Suis          |
| <i>Streptococcus thoralensis</i> DSM 12221 <sup>T</sup>                       | GCA_000380145.1          | Pluranimalium |
| <i>Streptococcus oralis</i> subsp. <i>dentisani</i> CECT 7747 <sup>T</sup>    | GCA_000382825.1          | Mitis         |
| <i>Streptococcus hyovaginalis</i> DSM 12219 <sup>T</sup>                      | GCA_000420785.1          | Pluranimalium |
| <i>Streptococcus devriesei</i> DSM 19639 <sup>T</sup>                         | GCA_000423725.1          | Mutans        |
| <i>Streptococcus castoreus</i> DSM 17536 <sup>T</sup>                         | GCA_000425025.1          | Pyogenic      |
| <i>Streptococcus equi</i> subsp. <i>ruminatorum</i> CECT 5772 <sup>T</sup>    | GCA_000706805.1          | Pyogenic      |
| <i>Streptococcus sinensis</i> HKU4 <sup>T</sup>                               | GCA_000767835.1          | Gordonii      |
| <i>Streptococcus phocae</i> subsp. <i>salmonis</i> C-4 <sup>T</sup>           | GCA_000772915.1          | Pyogenic      |
| <i>Streptococcus uberis</i> NCTC3858 <sup>T</sup>                             | GCA_000785845.1          | Pyogenic      |
| <i>Streptococcus phocae</i> subsp. <i>phocae</i> ATCC 51973 <sup>T</sup>      | GCA_001302265.1          | Pyogenic      |
| <i>Streptococcus pneumoniae</i> DSM 20566 <sup>T</sup>                        | GCA_001457635.1          | Mitis         |

|                                                                                      |                 |               |
|--------------------------------------------------------------------------------------|-----------------|---------------|
| <i>Streptococcus iniae</i> QMA0248 <sup>T</sup>                                      | GCA_001595425.1 | Pyogenic      |
| <i>Streptococcus gallolyticus</i> subsp. <i>gallolyticus</i> DSM 16831 <sup>T</sup>  | GCA_002000985.1 | Bovis         |
| <i>Streptococcus pyogenes</i> DSM 20565 <sup>T</sup>                                 | GCA_002055535.1 | Pyogenic      |
| <i>Streptococcus pseudopneumoniae</i> ATCC BAA-960 <sup>T</sup>                      | GCA_002087075.1 | Mitis         |
| <i>Streptococcus pluranimalium</i> TH11417                                           | GCA_002953735.1 | Pluranimalium |
| <i>Streptococcus ruminantium</i> GUT187 <sup>T</sup>                                 | GCA_003609975.1 | Suis          |
| <i>Streptococcus halichoeri</i> CCUG 48324 <sup>T</sup>                              | GCA_009870755.1 | Pyogenic      |
| <i>Streptococcus oriscaviae</i> HKU75 <sup>T</sup>                                   | GCA_018137985.1 | Suis          |
| <i>Lactococcus lactis</i> ATCC 19435 <sup>T</sup>                                    | GCA_900099625.1 | Outgroup      |
| <i>Streptococcus equi</i> subsp. <i>equi</i> NCTC9682 <sup>T</sup>                   | GCA_900156215.1 | Pyogenic      |
| <i>Streptococcus agalactiae</i> NCTC 8181 <sup>T</sup>                               | GCA_900458965.1 | Pyogenic      |
| <i>Streptococcus acidominimus</i> NCTC 12957 <sup>T</sup>                            | GCA_900459045.1 | Suis          |
| <i>Streptococcus dysgalactiae</i> subsp. <i>equisimilis</i> NCTC 13762 <sup>T</sup>  | GCA_900459095.1 | Pyogenic      |
| <i>Streptococcus constellatus</i> subsp. <i>constellatus</i> NCTC 11325 <sup>T</sup> | GCA_900459125.1 | Gordonii      |
| <i>Streptococcus downei</i> NCTC 11391 <sup>T</sup>                                  | GCA_900459175.1 | Sobrinus      |
| <i>Streptococcus dysgalactiae</i> subsp. <i>dysgalactiae</i> NCTC 13731 <sup>T</sup> | GCA_900459225.1 | Pyogenic      |
| <i>Streptococcus massiliensis</i> NCTC 13765 <sup>T</sup>                            | GCA_900459365.1 | Gordonii      |
| <i>Streptococcus infantarius</i> NCTC 13760 <sup>T</sup>                             | GCA_900459445.1 | Bovis         |
| <i>Streptococcus equi</i> subsp. <i>zooepidemicus</i> NCTC 4676 <sup>T</sup>         | GCA_900459475.1 | Pyogenic      |
| <i>Streptococcus gallolyticus</i> subsp. <i>macedonicus</i> NCTC 13767 <sup>T</sup>  | GCA_900459545.1 | Bovis         |
| <i>Streptococcus thermophilus</i> NCTC 12958 <sup>T</sup>                            | GCA_900474985.1 | Salivarius    |
| <i>Streptococcus gordonii</i> NCTC 7865 <sup>T</sup>                                 | GCA_900475015.1 | Gordonii      |
| <i>Streptococcus ferus</i> DSM 20646 <sup>T</sup>                                    | GCA_900475025.1 | Mutans        |
| <i>Streptococcus mutans</i> FDAARGOS 1458 <sup>T</sup>                               | GCA_900475095.1 | Mutans        |
| <i>Streptococcus sobrinus</i> NCTC 12279 <sup>T</sup>                                | GCA_900475395.1 | Sobrinus      |
| <i>Streptococcus porcinus</i> NCTC 10999 <sup>T</sup>                                | GCA_900475415.1 | Pyogenic      |
| <i>Streptococcus cristatus</i> NCTC 12479 <sup>T</sup>                               | GCA_900475445.1 | Gordonii      |
| <i>Streptococcus sanguinis</i> NCTC 7863 <sup>T</sup>                                | GCA_900475505.1 | Gordonii      |

|                                                                                     |                 |            |
|-------------------------------------------------------------------------------------|-----------------|------------|
| <i>Streptococcus lutetiensis</i> NCTC 13774 <sup>T</sup>                            | GCA_900475675.1 | Bovis      |
| <i>Streptococcus intermedius</i> NCTC 11324 <sup>T</sup>                            | GCA_900475975.1 | Gordonii   |
| <i>Streptococcus australis</i> NCTC 13166 <sup>T</sup>                              | GCA_900476055.1 | Mitis      |
| <i>Streptococcus gallolyticus</i> subsp. <i>pasteurianus</i> NCTC13784 <sup>T</sup> | GCA_900478025.1 | Bovis      |
| <i>Streptococcus salivarius</i> NCTC 8618 <sup>T</sup>                              | GCA_900636435.1 | Salivarius |
| <i>Streptococcus anginosus</i> subsp. <i>anginosus</i> NCTC 10713 <sup>T</sup>      | GCA_900636475.1 | Gordonii   |
| <i>Streptococcus urinalis</i> NCTC 13766 <sup>T</sup>                               | GCA_900636885.1 | Pyogenic   |
| <i>Streptococcus oralis</i> subsp. <i>oralis</i> NCTC 11427 <sup>T</sup>            | GCA_900637025.1 | Mitis      |
| <i>Streptococcus pseudoporcinus</i> NCTC 13786 <sup>T</sup>                         | GCA_900637075.1 | Pyogenic   |

---

<sup>a</sup>Genomes downloaded from JGI (2).

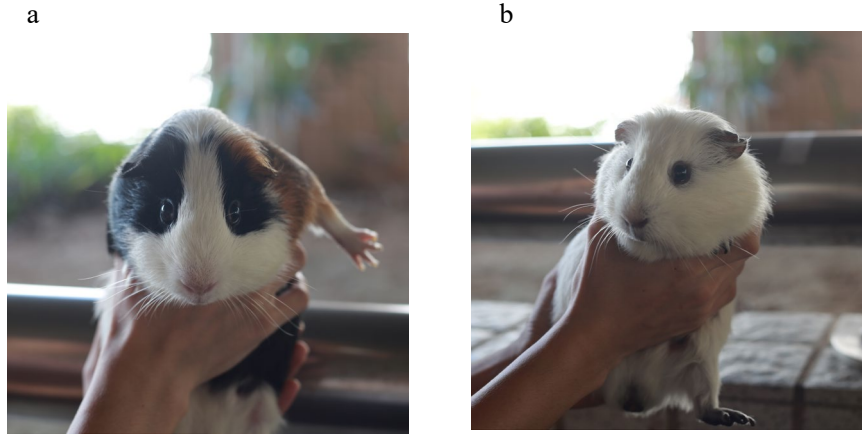

**Fig. S1.** The two guinea pigs purchased from a local pet store; (a) GP1 and (b) GP2.

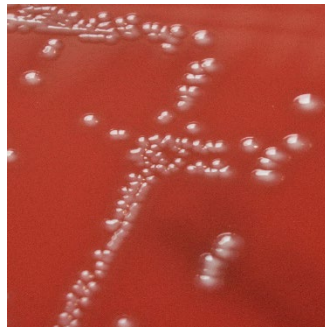

**Fig. S2.** Colony morphology of HKU75<sup>T</sup>. Growth on sheep blood agar after 24 h of incubation at 37°C with 5% CO<sub>2</sub>.

## References

1. Davis JJ, Wattam AR, Aziz RK, Brettin T, Butler R, Butler RM, Chlenski P, Conrad N, Dickerman A, Dietrich EM, Gabbard JL, Gerdes S, Guard A, Kenyon RW, MacHi D, Mao C, Murphy-Olson D, Nguyen M, Nordberg EK, Olsen GJ, Olson RD, Overbeek JC, Overbeek R, Parrello B, Pusch GD, Shukla M, Thomas C, Vanoeffelen M, Vonstein V, Warren AS, Xia F, Xie D, Yoo H, Stevens R. 2020. The PATRIC Bioinformatics Resource Center: expanding data and analysis capabilities. *Nucleic acids research* 48:D606-D612.
2. Nordberg H, Cantor M, Dusheyko S, Hua S, Poliakov A, Shabalov I, Smirnova T, Grigoriev IV, Dubchak I. 2014. The genome portal of the Department of Energy Joint Genome Institute: 2014 updates. *Nucleic Acids Res* 42:D26-31.
